# Supplementary material for: Host proteome linked to HPV E7-mediated specific gene hypermethylation in cancer pathways
Source: Infect Agent Cancer. 2020 Feb 3;15:7. doi: 10.1186/s13027-020-0271-4 (PMC6998090; doi:10.1186/s13027-020-0271-4)
Supplement: Supplementary file 2 — Additional file 2 : Table S1. List of total identified proteins of E7-transfected HEK293 by Proteome Discover. [file 13027_2020_271_MOESM2_ESM.xlsx]

## Sheet: Sheet1
upplementary Table S1 List of proteins identified by LC-MS/MS in transfected HEK293 cell line (Proteome Discoverer)
Accession	Description	Sum PEP Score	Coverage [%]	Pep	PSMs	Unique Peptides	Protein Groups	AAs	MW [kDa]	calc. pI	Score Sequest
				tides							HT
P61604	10 kDa heat shock protein	15.913	56	7	26	7	1	102	10.9	8.92	28.8
Q15029	116 kDa U5 small nuclear ribonucleoprotein component	3.841	4	3	5	3	1	972	109.4	5	0
P62258	14-3-3 protein epsilon	18.794	30	8	23	7	1	255	29.2	4.74	14.72
P61981	14-3-3 protein gamma	8.601	20	4	12	3	1	247	28.3	4.89	5.49
P27348	14-3-3 protein theta	8.401	19	4	10	3	1	245	27.7	4.78	11.92
E7EX29	14-3-3 protein zeta/delta	3.979	9	2	3	1	1	246	28	4.92	3.39
P63104	14-3-3 protein zeta/delta	8.415	44	5	9	4	1	245	27.7	4.79	5.49
A0A087WW66	26S proteasome non-ATPase regulatory subunit 1	1.001	1	1	1	1	1	953	105.8	5.41	0
O00487	26S proteasome non-ATPase regulatory subunit 14	1.454	4	1	2	1	1	310	34.6	6.52	0
Q13200	26S proteasome non-ATPase regulatory subunit 2	6.251	4	2	3	2	1	908	100.1	5.2	2.99
O43242	26S proteasome non-ATPase regulatory subunit 3	1.701	2	1	1	1	1	534	60.9	8.44	0
A0A087X2I1	26S proteasome regulatory subunit 10B	3.437	7	2	3	2	1	403	45.8	7.78	0
P62191	26S proteasome regulatory subunit 4	1.995	3	1	2	1	1	440	49.2	6.21	0
P17980	26S proteasome regulatory subunit 6A	3.298	7	2	3	2	1	439	49.2	5.24	0
P43686	26S proteasome regulatory subunit 6B	2.191	3	1	4	1	1	418	47.3	5.21	0
P35998	26S proteasome regulatory subunit 7	1.452	3	1	1	1	1	433	48.6	5.95	0
P62195	26S proteasome regulatory subunit 8	1.795	3	1	1	1	1	406	45.6	7.55	0
Q9H2W6	39S ribosomal protein L46, mitochondrial	1.053	3	1	1	1	1	279	31.7	7.05	0
Q99714	3-hydroxyacyl-CoA dehydrogenase type-2	3.866	15	3	4	3	1	261	26.9	7.78	0
P46783	40S ribosomal protein S10	3.699	20	2	4	2	1	165	18.9	10.15	0
P62280	40S ribosomal protein S11	15.524	36	5	16	5	1	158	18.4	10.3	5.12
P25398	40S ribosomal protein S12	11.208	37	4	15	4	1	132	14.5	7.21	9.42
P62277	40S ribosomal protein S13	3.004	19	2	4	2	1	151	17.2	10.54	1.62
P62263	40S ribosomal protein S14	9.714	26	4	10	4	1	151	16.3	10.05	2.64
K7ELC2	40S ribosomal protein S15	3.036	8	1	2	1	1	152	17.7	10.39	2.13
P62244	40S ribosomal protein S15a	-	5	1	1	1	1	130	14.8	10.13	0
A0A0G2JQH2	40S ribosomal protein S18	3.54	39	1	4	1	1	33	3.8	11	2.06
P62269	40S ribosomal protein S18	7.089	20	4	8	4	1	152	17.7	10.99	0
M0R2L9	40S ribosomal protein S19	11.196	69	4	14	1	1	71	8.2	8.88	17.66
P39019	40S ribosomal protein S19	11.925	37	6	16	3	1	145	16.1	10.32	13.1
P15880	40S ribosomal protein S2	9.893	21	5	10	5	1	293	31.3	10.24	5.38
P60866	40S ribosomal protein S20	8.834	32	3	9	3	1	119	13.4	9.94	0
P63220	40S ribosomal protein S21	14.958	43	5	11	5	1	83	9.1	8.5	11.26
P62266	40S ribosomal protein S23	4.805	16	2	4	2	1	143	15.8	10.49	8.53
A0A2R8YD14	40S ribosomal protein S24	3.664	5	1	3	1	1	165	19.2	10.98	5.02
P62851	40S ribosomal protein S25	4.876	15	2	8	2	1	125	13.7	10.11	9.52
P62854	40S ribosomal protein S26	1.579	13	1	1	1	1	115	13	11	0
H0YMV8	40S ribosomal protein S27	1.674	13	1	1	1	1	100	11.3	9.32	0
P62857	40S ribosomal protein S28	5.811	41	2	6	2	1	69	7.8	10.7	0
A0A2R8Y851	40S ribosomal protein S29	1.005	8	1	1	1	1	87	10.2	9.85	0
P23396	40S ribosomal protein S3	7.217	26	4	8	4	1	243	26.7	9.66	3.4
E9PR30	40S ribosomal protein S30	2.778	12	2	4	2	1	98	10.9	11.56	0
P61247	40S ribosomal protein S3a	-	5	1	1	1	1	264	29.9	9.73	0
P62701	40S ribosomal protein S4, X isoform	11.881	25	7	15	7	1	263	29.6	10.15	10.6
M0R0R2	40S ribosomal protein S5	8.118	12	2	3	2	1	225	25.3	9.76	4.97
P62753	40S ribosomal protein S6	-	4	1	1	1	1	249	28.7	10.84	1.94
P62081	40S ribosomal protein S7	4.832	18	2	4	2	1	194	22.1	10.1	3.59
P62241	40S ribosomal protein S8	8.616	13	2	8	2	1	208	24.2	10.32	4.04
A0A024R4M0	40S ribosomal protein S9	0.976	6	1	1	1	1	194	22.6	10.65	0
A0A0C4DG17	40S ribosomal protein SA	22.985	35	6	19	6	1	300	33.3	4.87	27.94
J3KPF3	4F2 cell-surface antigen heavy chain	2.878	4	2	4	2	1	631	68.1	5.05	0
P10809	60 kDa heat shock protein, mitochondrial	-	2	1	1	1	1	573	61	5.87	0
P05388	60S acidic ribosomal protein P0	0.901	4	1	1	1	1	317	34.3	5.97	0
P05386	60S acidic ribosomal protein P1	4.555	14	1	2	1	1	114	11.5	4.32	6.62
P05387	60S acidic ribosomal protein P2	15.831	43	4	22	4	1	115	11.7	4.54	20.13
A0A087WV22	60S ribosomal protein L10	5.488	22	4	7	4	1	178	20.4	10.52	0
P27635	60S ribosomal protein L10	2.756	20	2	2	1	1	214	24.6	10.08	0
P62906	60S ribosomal protein L10a	8.836	17	3	10	3	1	217	24.8	9.94	4.25
P62913	60S ribosomal protein L11	6.015	13	2	4	2	1	178	20.2	9.6	6.71
P30050	60S ribosomal protein L12	4.302	15	2	9	2	1	165	17.8	9.42	1.8
P26373	60S ribosomal protein L13	6.693	23	4	5	4	1	211	24.2	11.65	2.55
M0QYS1	60S ribosomal protein L13a	1.93	4	1	2	1	1	210	24.2	10.86	0
P61313	60S ribosomal protein L15	-	4	1	1	1	1	204	24.1	11.62	0
J3QQ67	60S ribosomal protein L18	5.449	11	2	6	2	1	190	21.8	11.72	3.74
A0A075B7A0	60S ribosomal protein L18	3.175	14	2	3	1	1	138	16.2	11.66	0
Q02543	60S ribosomal protein L18a	5.512	24	3	5	3	1	176	20.7	10.71	0
P84098	60S ribosomal protein L19	-	5	1	1	1	1	196	23.5	11.47	0
P46778	60S ribosomal protein L21	6.53	23	3	11	3	1	160	18.6	10.49	1.69
P35268	60S ribosomal protein L22	4.856	19	2	4	2	1	128	14.8	9.19	2.16
P62829	60S ribosomal protein L23	7.063	39	4	11	4	1	140	14.9	10.51	5.71
A8MUS3	60S ribosomal protein L23a	4.516	5	2	4	2	1	194	21.9	10.48	1.8
P83731	60S ribosomal protein L24	8.971	22	3	6	3	1	157	17.8	11.25	11.16
P61353	60S ribosomal protein L27	5.828	21	3	10	3	1	136	15.8	10.56	3.4
P46776	60S ribosomal protein L27a	4.643	18	2	5	2	1	148	16.6	11	0
H0YKD8	60S ribosomal protein L28	1.853	5	1	2	1	1	170	19.1	11.46	0
P47914	60S ribosomal protein L29	5.806	14	3	6	3	1	159	17.7	11.66	5.12
P39023	60S ribosomal protein L3	13.045	9	4	12	4	1	403	46.1	10.18	1.7
P62888	60S ribosomal protein L30	6.208	43	4	11	4	1	115	12.8	9.63	0
B7Z4C8	60S ribosomal protein L31	-	7	1	1	1	1	130	15.1	10.37	0
F8W727	60S ribosomal protein L32	6.224	20	2	5	2	1	153	18	10.59	2.66
P49207	60S ribosomal protein L34	1.365	6	1	3	1	1	117	13.3	11.47	3.32
P42766	60S ribosomal protein L35	2.542	7	1	1	1	1	123	14.5	11.05	0
Q9Y3U8	60S ribosomal protein L36	1.214	10	1	1	1	1	105	12.2	11.59	0
P61513	60S ribosomal protein L37a	3.031	13	1	4	1	1	92	10.3	10.43	0
P63173	60S ribosomal protein L38	1.062	19	1	2	1	1	70	8.2	10.1	0
P62891	60S ribosomal protein L39	1.58	20	1	1	1	1	51	6.4	12.56	0
P36578	60S ribosomal protein L4	-	2	1	1	1	1	427	47.7	11.06	1.82
P46777	60S ribosomal protein L5	8.874	22	5	8	5	1	297	34.3	9.72	2.69
Q02878	60S ribosomal protein L6	12.235	24	7	17	7	1	288	32.7	10.58	3.42
P18124	60S ribosomal protein L7	10.661	24	5	11	5	1	248	29.2	10.65	2.48
P62424	60S ribosomal protein L7a	15.314	27	6	18	6	1	266	30	10.61	6.89
P62917	60S ribosomal protein L8	8.266	17	4	8	4	1	257	28	11.03	0
A0A2R8Y5Y7	60S ribosomal protein L9	1.395	5	1	2	1	1	220	25	9.74	0
P52209	6-phosphogluconate dehydrogenase, decarboxylating	6.699	5	2	6	2	1	483	53.1	7.23	4.45
Q9BWD1	Acetyl-CoA acetyltransferase, cytosolic	1.145	6	1	1	1	1	397	41.3	6.92	0
P24752	Acetyl-CoA acetyltransferase, mitochondrial	2.672	6	2	3	2	1	427	45.2	8.85	0
P39687	Acidic leucine-rich nuclear phosphoprotein 32 family member A	1.664	6	1	2	1	1	249	28.6	4.09	0
A2A274	Aconitate hydratase, mitochondrial	1.403	2	1	1	1	1	805	87.8	7.37	0
P68032	Actin, alpha cardiac muscle 1	42.48	31	10	50	2	1	377	42	5.39	61.5
P62736	Actin, aortic smooth muscle	29.609	28	8	22	1	1	377	42	5.39	34.4
P60709	Actin, cytoplasmic 1	-	12	3	3	3	1	375	41.7	5.48	8.04
P61160	Actin-related protein 2	1.748	5	1	2	1	1	394	44.7	6.74	0
P53999	Activated RNA polymerase II transcriptional coactivator p15	1.221	5	1	3	1	1	127	14.4	9.6	0
O95433	Activator of 90 kDa heat shock protein ATPase homolog 1	1.735	5	1	3	1	1	338	38.3	5.53	0
C9JIF9	Acylamino-acid-releasing enzyme	1.674	2	1	1	1	1	737	81.6	5.54	0
Q5T4U5	Acyl-Coenzyme A dehydrogenase, C-4 to C-12 straight chain, isoform CRA_a	3.054	5	2	3	2	1	454	50.2	7.8	0
P07741	Adenine phosphoribosyltransferase	6.448	21	3	9	3	1	180	19.6	6.02	5.63
P23526	Adenosylhomocysteinase	5.832	5	3	5	3	1	432	47.7	6.34	1.69
P54819	Adenylate kinase 2, mitochondrial	13.316	43	7	9	7	1	239	26.5	7.81	5.03
Q01518	Adenylyl cyclase-associated protein 1	1.591	3	1	2	1	1	475	51.9	8.06	0
Q9HDC9	Adipocyte plasma membrane-associated protein	1.696	4	1	1	1	1	416	46.5	6.16	0
P05141	ADP/ATP translocase 2	11.647	21	6	14	6	1	298	32.8	9.69	3.27
P49588	Alanine--tRNA ligase, cytoplasmic	1.787	3	2	2	2	1	968	106.7	5.53	0
P30837	Aldehyde dehydrogenase X, mitochondrial	2.658	4	2	5	2	1	517	57.2	6.8	0
P12814	Alpha-actinin-1	7.675	5	4	9	1	1	892	103	5.41	3.48
O43707	Alpha-actinin-4	8.041	5	4	10	1	1	911	104.8	5.44	3.48
P06733	Alpha-enolase	75.524	63	19	85	19	1	434	47.1	7.39	98.54
P06280	Alpha-galactosidase A	1.308	4	1	2	1	1	429	48.7	5.6	0
Q06203	Amidophosphoribosyltransferase	1.304	2	1	1	1	1	517	57.4	6.76	0
Q12904	Aminoacyl tRNA synthase complex-interacting multifunctional protein 1	2.887	10	2	3	2	1	312	34.3	8.43	0
Q4VCS5	Angiomotin	4.742	2	2	7	2	1	1084	118	7.64	0
P0C6C1	Ankyrin repeat domain-containing protein 34C	0.92	2	1	1	1	1	535	58.2	9.03	0
P08758	Annexin A5	7.57	13	3	7	3	1	320	35.9	5.05	2.16
Q9BZZ5	Apoptosis inhibitor 5	0.977	3	1	1	1	1	524	59	7.34	0
O95831	Apoptosis-inducing factor 1, mitochondrial	-	2	1	1	1	1	613	66.9	8.95	1.7
B0YIW6	Archain 1, isoform CRA_a	1.057	3	1	1	1	1	552	61.6	5.85	0
Q7L4I2	Arginine/serine-rich coiled-coil protein 2	1.071	3	1	1	1	1	434	50.5	11.33	0
P54136	Arginine--tRNA ligase, cytoplasmic	2.729	5	2	2	2	1	660	75.3	6.68	0
P17174	Aspartate aminotransferase, cytoplasmic	3.745	6	2	6	2	1	413	46.2	7.01	0
P00505	Aspartate aminotransferase, mitochondrial	1.072	4	1	1	1	1	430	47.5	9.01	0
P14868	Aspartate--tRNA ligase, cytoplasmic	4.147	6	2	4	2	1	501	57.1	6.55	0
P25705	ATP synthase subunit alpha, mitochondrial	13.39	14	7	17	7	1	553	59.7	9.13	11.63
P06576	ATP synthase subunit beta, mitochondrial	39.115	37	14	41	14	1	529	56.5	5.4	19.71
O75947	ATP synthase subunit d, mitochondrial	2.013	6	1	2	1	1	161	18.5	5.3	0
P30049	ATP synthase subunit delta, mitochondrial	3.28	5	1	1	1	1	168	17.5	5.49	2.04
P56385	ATP synthase subunit e, mitochondrial	1.071	14	1	2	1	1	69	7.9	9.35	0
P56381	ATP synthase subunit epsilon, mitochondrial	1.022	22	1	1	1	1	51	5.8	9.92	0
P36542	ATP synthase subunit gamma, mitochondrial	0.835	3	1	2	1	1	298	33	9.22	0
Q9UII2	ATPase inhibitor, mitochondrial	2.586	9	1	4	1	1	106	12.2	9.35	2.07
P53396	ATP-citrate synthase	21.384	11	11	26	11	1	1101	120.8	7.33	4.46
Q08211	ATP-dependent RNA helicase A	19.96	10	12	25	12	1	1270	140.9	6.84	1.64
A0A0D9SF53	ATP-dependent RNA helicase DDX3X	17.889	13	8	25	7	1	733	81.4	8.07	12.73
O43491	Band 4.1-like protein 2	1.892	2	1	1	1	1	1005	112.5	5.44	0
O75531	Barrier-to-autointegration factor	0.964	8	1	1	1	1	89	10.1	6.09	0
Q9Y6E2	Basic leucine zipper and W2 domain-containing protein 2	1.242	2	1	3	1	1	419	48.1	6.68	0
P35613	Basigin	2.413	8	2	2	2	1	385	42.2	5.66	0
P51572	B-cell receptor-associated protein 31	2.459	6	1	4	1	1	246	28	8.44	0
Q562R1	Beta-actin-like protein 2	18.363	15	5	24	1	1	376	42	5.59	31.35
P07814	Bifunctional glutamate/proline--tRNA ligase	4.224	4	3	3	3	1	1512	170.5	7.33	0
P31939	Bifunctional purine biosynthesis protein PURH	5.639	6	3	8	3	1	592	64.6	6.71	5.66
Q9H3K6	BolA-like protein 2	4.577	21	2	3	2	1	86	10.1	6.52	1.61
Q6UX41	Butyrophilin-like protein 8	1.076	3	1	1	1	1	500	56.7	8.12	0
F5H2F4	C-1-tetrahydrofolate synthase, cytoplasmic	15.07	5	5	14	5	1	1020	110.5	8.43	2.34
P27708	CAD protein	1.913	1	1	2	1	1	2225	242.8	6.46	0
Q9HB71	Calcyclin-binding protein	5.126	7	2	4	2	1	228	26.2	8.25	1.65
P27824	Calnexin	6.732	10	4	10	4	1	592	67.5	4.6	0
P27797	Calreticulin	6.974	12	4	8	4	1	417	48.1	4.44	0
B1AK88	Capping protein (Actin filament) muscle Z-line, beta, isoform CRA_d	4.882	7	2	7	2	1	301	33.8	6.43	3.54
Q14444	Caprin-1	3.518	3	2	3	2	1	709	78.3	5.25	0
P00918	Carbonic anhydrase 2	1.457	4	1	3	1	1	260	29.2	7.4	0
O75828	Carbonyl reductase [NADPH] 3	1.694	3	1	1	1	1	277	30.8	6.18	1.67
P68400	Casein kinase II subunit alpha	0.983	5	1	1	1	1	391	45.1	7.74	0
B7Z6Z4	cDNA FLJ56329, highly similar to Myosin light polypeptide 6	4.599	18	3	3	3	1	238	26.7	5.08	0
Q8N163	Cell cycle and apoptosis regulator protein 2	2.956	3	2	4	2	1	923	102.8	5.22	0
P60953	Cell division control protein 42 homolog	2.678	5	1	3	1	1	191	21.2	6.55	1.75
A0A024QZP7	Cell division cycle 2, G1 to S and G2 to M, isoform CRA_a	2.178	6	2	3	2	1	297	34.1	8.4	3.36
Q9NX58	Cell growth-regulating nucleolar protein	1.002	4	1	1	1	1	379	43.6	9.54	0
P41208	Centrin-2	1.172	7	1	1	1	1	172	19.7	5	0
Q9Y3Y2	Chromatin target of PRMT1 protein	3.098	5	1	1	1	1	248	26.4	12.23	0
Q13185	Chromobox protein homolog 3	3.841	15	2	6	2	1	183	20.8	5.33	2.03
P45973	Chromobox protein homolog 5	2.078	7	1	4	1	1	191	22.2	5.86	0
O75390	Citrate synthase, mitochondrial	10.342	7	4	12	4	1	466	51.7	8.32	10.9
A0A087WVQ6	Clathrin heavy chain	14.837	5	6	14	6	1	1679	191.9	5.69	5.51
Q9H0L4	Cleavage stimulation factor subunit 2 tau variant	0.98	2	1	1	1	1	616	64.4	7.25	0
M0QXB4	Coatomer protein complex, subunit epsilon, isoform CRA_g	1.089	6	1	1	1	1	331	36.9	5.16	0
Q9Y678	Coatomer subunit gamma-1	1.517	2	1	1	1	1	874	97.7	5.47	0
E9PK25	Cofilin-1	8.124	20	3	10	2	1	204	22.7	8.34	4.04
Q9H6F5	Coiled-coil domain-containing protein 86	1.016	4	1	1	1	1	360	40.2	10.33	0
D6W5Y5	Cold inducible RNA binding protein, isoform CRA_c	1.418	5	1	2	1	1	297	31.9	9.61	0
O75534	Cold shock domain-containing protein E1	1.447	2	1	2	1	1	798	88.8	6.25	0
Q07021	Complement component 1 Q subcomponent-binding protein	1.025	10	1	2	1	1	282	31.3	4.84	0
D6RFN0	COP9 signalosome complex subunit 4	1.247	2	1	1	1	1	438	49.7	5.81	0
O75131	Copine-3	0.874	3	1	1	1	1	537	60.1	5.85	0
O75367	Core histone macro-H2A.1	1.168	3	1	1	1	1	372	39.6	9.79	0
Q9ULV4	Coronin-1C	2.691	3	1	1	1	1	474	53.2	7.08	2.04
P12277	Creatine kinase B-type	24.904	36	8	40	8	1	381	42.6	5.59	30.58
P12532	Creatine kinase U-type, mitochondrial	7.026	14	3	7	3	1	417	47	8.34	2.06
P17812	CTP synthase 1	1.362	1	1	1	1	1	591	66.6	6.46	0
P42771	Cyclin-dependent kinase inhibitor 2A	2.435	8	1	2	1	1	156	16.5	5.81	0
P61024	Cyclin-dependent kinases regulatory subunit 1	1.884	13	1	3	1	1	79	9.7	8.94	0
Q9UHD1	Cysteine and histidine-rich domain-containing protein 1	0.952	9	1	1	1	1	332	37.5	7.87	0
P31930	Cytochrome b-c1 complex subunit 1, mitochondrial	4.936	6	2	4	2	1	480	52.6	6.37	1.9
P99999	Cytochrome c	4.199	17	2	5	2	1	105	11.7	9.57	0
Q9Y2R0	Cytochrome c oxidase assembly factor 3	0.97	9	1	1	1	1	106	11.7	9.6	0
P00403	Cytochrome c oxidase subunit 2	1.724	7	1	1	1	1	227	25.5	4.82	0
P13073	Cytochrome c oxidase subunit 4 isoform 1, mitochondrial	2.962	12	2	2	2	1	169	19.6	9.51	0
H3BNX8	Cytochrome c oxidase subunit 5A, mitochondrial	3.208	6	1	3	1	1	153	17.2	6	6.18
P10606	Cytochrome c oxidase subunit 5B, mitochondrial	7.27	30	3	9	3	1	129	13.7	8.81	4.23
P09669	Cytochrome c oxidase subunit 6C	2.255	11	1	2	1	1	75	8.8	10.39	0
P08574	Cytochrome c1, heme protein, mitochondrial	1.68	4	1	1	1	1	325	35.4	9	0
Q96F07	Cytoplasmic FMR1-interacting protein 2	1.471	1	1	1	1	1	1278	148.3	7.31	0
Q07065	Cytoskeleton-associated protein 4	3.888	5	2	2	2	1	602	66	5.92	0
P28838	Cytosol aminopeptidase	1.717	2	1	2	1	1	519	56.1	7.93	0
O00154	Cytosolic acyl coenzyme A thioester hydrolase	1.229	3	1	1	1	1	380	41.8	8.54	0
O43175	D-3-phosphoglycerate dehydrogenase	-	3	1	1	1	1	533	56.6	6.71	2.14
Q5BKZ1	DBIRD complex subunit ZNF326	1.395	2	1	2	1	1	582	65.6	5.15	0
P61962	DDB1- and CUL4-associated factor 7	1.043	3	1	1	1	1	342	38.9	5.52	0
P54886	Delta-1-pyrroline-5-carboxylate synthase	0.936	2	1	1	1	1	795	87.2	7.12	0
P33316	Deoxyuridine 5'-triphosphate nucleotidohydrolase, mitochondrial	2.328	3	1	4	1	1	252	26.5	9.36	6.88
P60981	Destrin	3.949	10	2	4	1	1	165	18.5	7.85	0
Q9Y295	Developmentally-regulated GTP-binding protein 1	1.824	3	1	1	1	1	367	40.5	8.9	0
P09622	Dihydrolipoyl dehydrogenase, mitochondrial	6.892	11	4	4	4	1	509	54.1	7.85	0
O00273	DNA fragmentation factor subunit alpha	4.1	3	1	3	1	1	331	36.5	4.79	4.17
P49736	DNA replication licensing factor MCM2	2.327	1	1	2	1	1	904	101.8	5.52	0
P33992	DNA replication licensing factor MCM5	1.041	2	1	2	1	1	734	82.2	8.37	0
Q14566	DNA replication licensing factor MCM6	2.304	2	2	2	2	1	821	92.8	5.41	0
P33993	DNA replication licensing factor MCM7	5.062	8	4	6	4	1	719	81.3	6.46	0
P11387	DNA topoisomerase 1	3.088	2	1	3	1	1	765	90.7	9.31	0
P11388	DNA topoisomerase 2-alpha	2.551	1	1	3	1	1	1531	174.3	8.72	3.64
P27695	DNA-(apurinic or apyrimidinic site) lyase	-	3	1	1	1	1	318	35.5	8.12	0
P78527	DNA-dependent protein kinase catalytic subunit	1.127	0	1	1	1	1	4128	468.8	7.12	0
P31689	DnaJ homolog subfamily A member 1	1.963	3	1	4	1	1	397	44.8	7.08	0
Q99615	DnaJ homolog subfamily C member 7	2.321	3	1	3	1	1	494	56.4	6.96	2.05
P39656	Dolichyl-diphosphooligosaccharide	2.218	2	1	1	1	1	456	50.8	6.55	0
P04843	Dolichyl-diphosphooligosaccharide--protein glycosyltransferase subunit 1	5.629	6	3	7	3	1	607	68.5	6.38	0
Q14203	Dynactin subunit 1	1.011	1	1	2	1	1	1278	141.6	5.81	0
Q13561	Dynactin subunit 2	2.872	5	1	3	1	1	401	44.2	5.21	0
Q86Y56	Dynein assembly factor 5, axonemal	1.424	2	1	1	1	1	855	93.5	6.42	0
P63167	Dynein light chain 1, cytoplasmic	2.783	12	1	3	1	1	89	10.4	7.4	0
Q9C037	E3 ubiquitin-protein ligase TRIM4	1.269	2	1	1	1	1	500	57.4	8.1	0
Q92616	eIF-2-alpha kinase activator GCN1	1.949	1	2	2	2	1	2671	292.6	7.47	0
Q15717	ELAV-like protein 1	8.496	11	3	7	3	1	326	36.1	9.17	9.39
P38117	Electron transfer flavoprotein subunit beta	1.124	5	1	1	1	1	255	27.8	8.1	0
Q8IZ81	ELMO domain-containing protein 2	1.004	6	1	1	1	1	293	34.9	8.05	0
P68104	Elongation factor 1-alpha 1	-	5	1	1	1	1	462	50.1	9.01	2.41
P24534	Elongation factor 1-beta	2.74	4	2	2	2	1	225	24.7	4.67	0
E9PRY8	Elongation factor 1-delta	8.873	6	3	7	3	1	697	76.5	7.05	5.87
P26641	Elongation factor 1-gamma	24.612	25	8	24	8	1	437	50.1	6.67	9.98
P13639	Elongation factor 2	55.125	32	19	57	19	1	858	95.3	6.83	58.75
P49411	Elongation factor Tu, mitochondrial	11.272	26	7	12	7	1	452	49.5	7.61	0
I3L0M9	Elongin-B	1.815	10	1	1	1	1	140	15.6	5.17	0
P11021	Endoplasmic reticulum chaperone BiP	41.279	35	16	49	15	1	654	72.3	5.16	31.28
P30040	Endoplasmic reticulum resident protein 29	3.621	10	2	2	2	1	261	29	7.31	1.68
P14625	Endoplasmin	31.313	20	12	34	11	1	803	92.4	4.84	28.54
O60869	Endothelial differentiation-related factor 1	2.714	9	1	1	1	1	148	16.4	9.95	0
P84090	Enhancer of rudimentary homolog	2.537	30	1	1	1	1	104	12.3	5.92	0
P30084	Enoyl-CoA hydratase, mitochondrial	1.874	4	1	2	1	1	290	31.4	8.07	0
Q5HYB6	Epididymis luminal protein 189	10.714	24	5	11	5	1	232	27.2	4.74	0
P60842	Eukaryotic initiation factor 4A-I	18.002	19	6	17	5	1	406	46.1	5.48	11.71
P38919	Eukaryotic initiation factor 4A-III	4.739	7	2	5	1	1	411	46.8	6.73	0
Q8IYD1	Eukaryotic peptide chain release factor GTP-binding subunit ERF3B	2.365	2	1	3	1	1	628	68.8	5.43	0
P62495	Eukaryotic peptide chain release factor subunit 1	2.355	2	1	1	1	1	437	49	5.71	0
P05198	Eukaryotic translation initiation factor 2 subunit 1	1.979	4	1	1	1	1	315	36.1	5.08	0
Q14152	Eukaryotic translation initiation factor 3 subunit A	5.586	3	3	5	3	1	1382	166.5	6.79	0
P55884	Eukaryotic translation initiation factor 3 subunit B	-	2	1	1	1	1	814	92.4	5	1.93
B5ME19	Eukaryotic translation initiation factor 3 subunit C-like protein	3.434	2	2	7	2	1	914	105.4	5.64	1.63
O15371	Eukaryotic translation initiation factor 3 subunit D	4.585	5	2	3	2	1	548	63.9	6.05	0
O00303	Eukaryotic translation initiation factor 3 subunit F	1.572	3	1	2	1	1	357	37.5	5.45	1.74
Q13347	Eukaryotic translation initiation factor 3 subunit I	9.4	17	5	9	5	1	325	36.5	5.64	0
Q9UBQ5	Eukaryotic translation initiation factor 3 subunit K	1.189	7	1	1	1	1	218	25	4.93	0
B0QY89	Eukaryotic translation initiation factor 3 subunit L	1.097	2	1	1	1	1	607	70.9	6.65	0
Q04637	Eukaryotic translation initiation factor 4 gamma 1	4.228	2	2	5	2	1	1599	175.4	5.33	2.11
E7EX17	Eukaryotic translation initiation factor 4B	1.952	3	1	1	1	1	616	69.7	5.67	0
P55010	Eukaryotic translation initiation factor 5	2.388	6	2	2	2	1	431	49.2	5.58	0
I3L504	Eukaryotic translation initiation factor 5A-1	10.592	17	4	13	4	1	186	20.5	5.25	14.28
Q9NPD3	Exosome complex component RRP41	2.305	5	1	2	1	1	245	26.4	6.52	0
P55060	Exportin-2	4.481	4	3	7	3	1	971	110.3	5.77	5.1
Q9Y5B9	FACT complex subunit SPT16	2.265	1	1	3	1	1	1047	119.8	5.66	0
Q08945	FACT complex subunit SSRP1	0.953	2	1	1	1	1	709	81	6.87	0
P52907	F-actin-capping protein subunit alpha-1	1.913	6	1	4	1	1	286	32.9	5.69	0
E9PEB5	Far upstream element-binding protein 1	13.541	11	6	18	5	1	655	68.9	7.93	14.68
A0A087WTP3	Far upstream element-binding protein 2	-	1	1	1	1	1	711	73	7.71	1.63
Q96I24	Far upstream element-binding protein 3	5.6	5	3	4	3	1	572	61.6	8.38	0
P49327	Fatty acid synthase	9.345	3	6	9	6	1	2511	273.3	6.44	0
P21333	Filamin-A	5.048	1	2	6	2	1	2647	280.6	6.06	0
P51114	Fragile X mental retardation syndrome-related protein 1	1.585	3	1	1	1	1	621	69.7	6.15	0
J3KPS3	Fructose-bisphosphate aldolase	-	2	1	1	1	1	368	39.8	8.09	0
O60763	General vesicular transport factor p115	2.296	2	2	2	2	1	962	107.8	4.91	0
A0A2U3TZU2	Glucose-6-phosphate isomerase	5.878	9	4	5	4	1	597	67.2	8.97	3.43
K7ELL7	Glucosidase 2 subunit beta	2.971	2	1	4	1	1	535	60.2	4.41	3.8
P00367	Glutamate dehydrogenase 1, mitochondrial	1.635	3	1	1	1	1	558	61.4	7.8	0
P47897	Glutamine--tRNA ligase	1.077	1	1	2	1	1	775	87.7	7.15	0
P09211	Glutathione S-transferase P	1.276	5	1	2	1	1	210	23.3	5.64	0
P48637	Glutathione synthetase	1.096	2	1	1	1	1	474	52.4	5.92	0
P04406	Glyceraldehyde-3-phosphate dehydrogenase	-	4	1	1	1	1	335	36	8.46	2.76
P06737	Glycogen phosphorylase, liver form	5.295	4	2	6	2	1	847	97.1	7.17	0
U3KQ56	Glyoxylate reductase/hydroxypyruvate reductase	1.008	7	1	1	1	1	358	38.7	8.02	0
P49915	GMP synthase [glutamine-hydrolyzing]	0.955	2	1	1	1	1	693	76.7	6.87	0
Q12849	G-rich sequence factor 1	1.766	2	1	1	1	1	480	53.1	6.19	0
Q9HAV7	GrpE protein homolog 1, mitochondrial	1.409	4	1	1	1	1	217	24.3	8.12	0
J3KQE5	GTP-binding nuclear protein Ran	18.421	25	7	21	7	1	234	26.8	9.58	20.91
P62873	Guanine nucleotide-binding protein G(I)/G(S)/G(T) subunit beta-1	1.166	4	1	2	1	1	340	37.4	6	0
P62879	Guanine nucleotide-binding protein G(I)/G(S)/G(T) subunit beta-2	0.968	6	1	1	1	1	340	37.3	6	0
O60832	H/ACA ribonucleoprotein complex subunit DKC1	3.512	5	2	4	2	1	514	57.6	9.42	0
I3L0A0	HCG2044781	1.171	3	1	1	1	1	370	42.2	6.71	0
A0A0G2JIW1	Heat shock 70 kDa protein 1B	-	5	3	3	3	1	642	70.1	5.66	4.07
P34932	Heat shock 70 kDa protein 4	-	1	1	1	1	1	840	94.3	5.19	0
P11142	Heat shock cognate 71 kDa protein	87.307	34	23	109	20	1	646	70.9	5.52	157.91
Q92598	Heat shock protein 105 kDa	14.916	10	7	11	5	1	858	96.8	5.39	3.57
Q12931	Heat shock protein 75 kDa, mitochondrial	8.267	4	3	11	2	1	704	80.1	8.21	13.76
P07900	Heat shock protein HSP 90-alpha	-	4	3	3	1	1	732	84.6	5.02	2.37
P08238	Heat shock protein HSP 90-beta	-	4	3	3	1	1	724	83.2	5.03	2.37
P69905	Hemoglobin subunit alpha	6.915	22	3	7	3	1	142	15.2	8.68	5.85
P51858	Hepatoma-derived growth factor	2.906	8	2	3	2	1	240	26.8	4.73	0
D6RBZ0	Heterogeneous nuclear ribonucleoprotein A/B	3.536	12	3	3	2	1	327	35.7	6.95	0
Q99729	Heterogeneous nuclear ribonucleoprotein A/B	4.835	12	3	3	2	1	332	36.2	8.21	0
Q13151	Heterogeneous nuclear ribonucleoprotein A0	3.069	6	1	4	1	1	305	30.8	9.29	0
P09651	Heterogeneous nuclear ribonucleoprotein A1	16.995	27	6	20	6	1	372	38.7	9.13	11.1
P51991	Heterogeneous nuclear ribonucleoprotein A3	13.117	22	7	15	7	1	378	39.6	9.01	0
Q14103	Heterogeneous nuclear ribonucleoprotein D0	10.86	13	5	14	4	1	355	38.4	7.81	4.59
O14979	Heterogeneous nuclear ribonucleoprotein D-like	12.404	10	5	8	4	1	420	46.4	9.57	5.09
P52597	Heterogeneous nuclear ribonucleoprotein F	7.522	8	2	5	1	1	415	45.6	5.58	2.68
G8JLB6	Heterogeneous nuclear ribonucleoprotein H	25.517	20	8	19	7	1	472	51.2	6.8	16.52
P31942	Heterogeneous nuclear ribonucleoprotein H3	4.683	10	3	3	3	1	346	36.9	6.87	0
P61978	Heterogeneous nuclear ribonucleoprotein K	23.149	26	11	41	11	1	463	50.9	5.54	23.59
P14866	Heterogeneous nuclear ribonucleoprotein L	10.565	19	5	10	5	1	589	64.1	8.22	12.06
A0A087X0X3	Heterogeneous nuclear ribonucleoprotein M	18.618	18	10	16	10	1	730	77.5	8.78	11.81
P52272	Heterogeneous nuclear ribonucleoprotein M	39.253	31	18	47	18	1	730	77.5	8.7	30.56
O60506	Heterogeneous nuclear ribonucleoprotein Q	8.918	7	4	9	2	1	623	69.6	8.59	2.04
O43390	Heterogeneous nuclear ribonucleoprotein R	7.358	8	3	7	1	1	633	70.9	8.13	2.04
Q00839	Heterogeneous nuclear ribonucleoprotein U	49.599	24	14	33	14	1	825	90.5	6	47.28
Q9BUJ2	Heterogeneous nuclear ribonucleoprotein U-like protein 1	2.962	2	1	1	1	1	856	95.7	6.92	0
P22626	Heterogeneous nuclear ribonucleoproteins A2/B1	28.87	40	11	37	11	1	353	37.4	8.95	24.89
P07910	Heterogeneous nuclear ribonucleoproteins C1/C2	26.014	23	9	28	9	1	306	33.7	5.08	20.76
P09429	High mobility group protein B1	19.842	31	7	20	6	1	215	24.9	5.74	4.87
P26583	High mobility group protein B2	11.16	27	6	13	5	1	209	24	7.81	2.19
O15347	High mobility group protein B3	3.365	10	2	2	2	1	200	23	8.37	0
P17096	High mobility group protein HMG-I/HMG-Y	1.403	23	1	2	1	1	107	11.7	10.32	0
P49773	Histidine triad nucleotide-binding protein 1	5.349	21	2	5	2	1	126	13.8	6.95	0
Q92769	Histone deacetylase 2	2.024	2	1	2	1	1	488	55.3	5.91	0
P16402	Histone H1.3	31.168	23	8	26	8	1	221	22.3	11.02	34.83
P04908	Histone H2A type 1-B/E	42.725	61	8	42	3	1	130	14.1	11.05	87.28
Q6FI13	Histone H2A type 2-A	50.037	61	8	58	3	1	130	14.1	10.9	91.27
P0C0S5	Histone H2A.Z	9.766	43	3	14	2	1	128	13.5	10.58	14.82
U3KQK0	Histone H2B	35.444	48	8	38	3	1	166	18.8	10.54	47.67
A0A2R8Y619	Histone H2B	5.73	32	3	12	1	1	122	13.5	10.1	6.96
Q96A08	Histone H2B type 1-A	4.373	31	3	6	1	1	127	14.2	10.32	2.57
P23527	Histone H2B type 1-O	28.348	63	7	35	1	1	126	13.9	10.32	33.91
Q8N257	Histone H2B type 3-B	24.995	50	5	27	1	1	126	13.9	10.32	29.02
Q5TEC6	Histone H3	9.03	25	4	11	1	1	136	15.4	11.27	2.32
K7ES00	Histone H3.3	10.169	25	4	15	1	1	151	16.6	11.84	2.32
P62805	Histone H4	34.417	60	9	35	9	1	103	11.4	11.36	33.26
Q09028	Histone-binding protein RBBP4	5.64	8	2	5	1	1	425	47.6	4.89	1.62
Q16576	Histone-binding protein RBBP7	5.686	8	2	5	1	1	425	47.8	5.05	4.77
O43719	HIV Tat-specific factor 1	1.674	2	1	2	1	1	755	85.8	4.4	0
A6NEM2	Host cell factor 1	1.079	1	1	1	1	1	2080	213.3	7.33	0
P50502	Hsc70-interacting protein	6.69	6	2	8	2	1	369	41.3	5.27	3.23
E9PF18	Hydroxyacyl-coenzyme A dehydrogenase, mitochondrial	0.965	3	1	1	1	1	390	42.1	9.26	0
P00492	Hypoxanthine-guanine phosphoribosyltransferase	2.834	11	2	3	2	1	218	24.6	6.68	0
Q9Y4L1	Hypoxia up-regulated protein 1	4.51	2	2	4	2	1	999	111.3	5.22	0
P52292	Importin subunit alpha-1	8.155	11	4	7	4	1	529	57.8	5.4	0
Q14974	Importin subunit beta-1	7.926	4	2	3	2	1	876	97.1	4.78	3.31
Q8TEX9	Importin-4	2.421	2	2	2	2	1	1081	118.6	4.96	0
Q15181	Inorganic pyrophosphatase	2.087	10	1	2	1	1	289	32.6	5.86	0
P12268	Inosine-5'-monophosphate dehydrogenase 2	14.558	13	6	17	6	1	514	55.8	6.9	8.07
Q9NZI8	Insulin-like growth factor 2 mRNA-binding protein 1	7.111	7	3	9	3	1	577	63.4	9.2	0
Q68E01	Integrator complex subunit 3	1.871	3	1	1	1	1	1043	118	5.8	0
Q12905	Interleukin enhancer-binding factor 2	7.613	4	1	4	1	1	390	43	5.26	0
Q12906	Interleukin enhancer-binding factor 3	11.291	6	4	9	4	1	894	95.3	8.76	0
Q27J81	Inverted formin-2	1.195	1	1	1	1	1	1249	135.5	5.38	0
P50213	Isocitrate dehydrogenase [NAD] subunit alpha, mitochondrial	0.892	3	1	1	1	1	366	39.6	6.92	0
P48735	Isocitrate dehydrogenase [NADP], mitochondrial	2.884	6	2	3	2	1	452	50.9	8.69	0
P41252	Isoleucine--tRNA ligase, cytoplasmic	1.248	1	1	1	1	1	1262	144.4	6.15	0
Q9UK76	Jupiter microtubule associated homolog 1	4.008	26	2	4	2	1	154	16	5.6	0
Q9H910	Jupiter microtubule associated homolog 2	2.113	11	1	1	1	1	190	20.1	9.26	0
P13645	Keratin, type I cytoskeletal 10	2.851	2	1	4	1	1	584	58.8	5.21	0
P35527	Keratin, type I cytoskeletal 9	1.649	1	1	1	1	1	623	62	5.24	0
P04264	Keratin, type II cytoskeletal 1	-	2	1	1	1	1	644	66	8.12	2.14
P35908	Keratin, type II cytoskeletal 2 epidermal	1.866	2	1	1	1	1	639	65.4	8	1.98
Q07666	KH domain-containing, RNA-binding, signal transduction-associated protein 1	-	3	1	1	1	1	443	48.2	8.66	0
Q04760	Lactoylglutathione lyase	7.971	18	5	9	5	1	184	20.8	5.31	0
P42166	Lamina-associated polypeptide 2, isoform alpha	2.398	2	1	2	1	1	694	75.4	7.66	1.72
P42167	Lamina-associated polypeptide 2, isoforms beta/gamma	4.991	5	2	6	2	1	454	50.6	9.38	1.72
P20700	Lamin-B1 OS=Homo sapiens	9.479	10	6	15	5	1	586	66.4	5.16	0
Q03252	Lamin-B2 OS=Homo sapiens	3.81	4	2	4	1	1	620	69.9	5.59	0
P42704	Leucine-rich PPR motif-containing protein, mitochondrial	3.381	1	1	1	1	1	1394	157.8	6.13	0
Q96AG4	Leucine-rich repeat-containing protein 59	1.632	8	1	1	1	1	307	34.9	9.57	0
P00338	L-lactate dehydrogenase A chain	14.935	23	6	19	5	1	332	36.7	8.27	23.94
P07195	L-lactate dehydrogenase B chain	20.962	18	7	22	6	1	334	36.6	6.05	35.12
P05455	Lupus La protein	5.421	7	2	3	2	1	408	46.8	7.12	2.13
Q7LBC6	Lysine-specific demethylase 3B	1.1	1	1	1	1	1	1761	191.5	7.18	0
P14174	Macrophage migration inhibitory factor	3.411	8	1	5	1	1	115	12.5	7.88	8.05
P40925	Malate dehydrogenase, cytoplasmic	4.566	8	2	3	2	1	334	36.4	7.36	1.74
P40926	Malate dehydrogenase, mitochondrial	17.829	37	8	23	8	1	338	35.5	8.68	11.75
A8MXP9	Matrin-3	9.876	9	5	13	5	1	895	99.9	6.04	2.11
Q14676	Mediator of DNA damage checkpoint protein 1	1.145	1	1	2	1	1	2089	226.5	5.47	0
O00264	Membrane-associated progesterone receptor component 1	7.858	17	4	7	4	1	195	21.7	4.7	3.34
Q9BQA1	Methylosome protein 50	1.162	5	1	1	1	1	342	36.7	5.17	0
P54105	Methylosome subunit pICln	4.025	5	1	4	1	1	237	26.2	4.11	8.9
C9JRZ6	MICOS complex subunit	6.229	15	4	4	4	1	232	26.7	7.75	1.69
Q15691	Microtubule-associated protein RP/EB family member 1	4.268	13	2	4	2	1	268	30	5.14	0
Q9Y6C9	Mitochondrial carrier homolog 2	0.859	3	1	1	1	1	303	33.3	7.97	0
O43615	Mitochondrial import inner membrane translocase subunit TIM44	1.847	3	1	2	1	1	452	51.3	8.32	0
O60220	Mitochondrial import inner membrane translocase subunit Tim8 A	1.241	11	1	1	1	1	97	11	5.16	0
Q9NS69	Mitochondrial import receptor subunit TOM22 homolog	0.835	18	1	1	1	1	142	15.5	4.34	0
Q15785	Mitochondrial import receptor subunit TOM34	1.881	4	1	2	1	1	309	34.5	8.98	0
O43684	Mitotic checkpoint protein BUB3	1.422	2	1	2	1	1	328	37.1	6.84	0
P26038	Moesin	3.55	3	2	5	2	1	577	67.8	6.4	1.68
Q9UI30	Multifunctional methyltransferase subunit TRM112-like protein	1.861	10	1	3	1	1	125	14.2	5.26	0
P22234	Multifunctional protein ADE2	10.283	14	4	12	4	1	425	47	7.23	3.7
J3QRS3	Myosin regulatory light chain 12A	0.969	6	1	1	1	1	177	20.4	4.75	0
P35579	Myosin-9	8.94	3	5	7	5	1	1960	226.4	5.6	0
P29966	Myristoylated alanine-rich C-kinase substrate	2.261	7	1	2	1	1	332	31.5	4.45	0
Q13423	NAD(P) transhydrogenase, mitochondrial	0.849	1	1	1	1	1	1086	113.8	8.09	0
P49821	NADH dehydrogenase [ubiquinone] flavoprotein 1, mitochondrial	1.804	2	1	1	1	1	464	50.8	8.21	0
Q9BXJ9	N-alpha-acetyltransferase 15, NatA auxiliary subunit	5.324	4	3	7	3	1	866	101.2	7.42	0
Q9GZZ1	N-alpha-acetyltransferase 50	1.305	10	1	1	1	1	169	19.4	8.81	0
Q14697	Neutral alpha-glucosidase AB	9.068	7	5	10	5	1	944	106.8	6.14	0
P19878	Neutrophil cytosol factor 2	-	1	1	1	1	1	526	59.7	6.16	0
B1AHD1	NHP2-like protein 1	3.014	18	2	2	2	1	132	14.6	8.46	0
Q15233	Non-POU domain-containing octamer-binding protein	17.661	16	5	18	5	1	471	54.2	8.95	10.58
P49321	Nuclear autoantigenic sperm protein	10.943	7	4	10	4	1	788	85.2	4.3	9.26
Q9Y266	Nuclear migration protein nudC	5.262	13	3	6	3	1	331	38.2	5.38	1.86
Q8WUM0	Nuclear pore complex protein Nup133	0.963	2	1	1	1	1	1156	128.9	5.1	0
H3BVG0	Nuclear pore complex protein Nup93	1.093	2	1	1	1	1	880	99.5	5.73	0
P61970	Nuclear transport factor 2	1.331	11	1	2	1	1	127	14.5	5.38	0
A0A0A0MRM9	Nucleolar and coiled-body phosphoprotein 1	3.105	4	2	7	2	1	708	74.6	9.47	0
O00567	Nucleolar protein 56	3.044	4	2	4	2	1	594	66	9.19	0
Q9Y2X3	Nucleolar protein 58	1.076	3	1	1	1	1	529	59.5	8.92	0
Q9NR30	Nucleolar RNA helicase 2	4.47	7	3	4	3	1	783	87.3	9.28	0
P19338	Nucleolin	42.589	22	15	35	15	1	710	76.6	4.7	31.74
P06748	Nucleophosmin	48.622	39	9	45	9	1	294	32.6	4.78	54.11
O75607	Nucleoplasmin-3	1.537	8	1	1	1	1	178	19.3	4.63	0
Q8NFH5	Nucleoporin NUP35	2.087	4	1	1	1	1	326	34.8	9.09	0
P12270	Nucleoprotein TPR	1.457	0	1	2	1	1	2363	267.1	5.02	0
Q32Q12	Nucleoside diphosphate kinase	18.165	45	6	25	6	1	292	32.6	8.48	18.41
P55209	Nucleosome assembly protein 1-like 1	3.778	6	3	4	2	1	391	45.3	4.46	0
Q99733	Nucleosome assembly protein 1-like 4	5.726	12	3	3	2	1	375	42.8	4.69	0
P04181	Ornithine aminotransferase, mitochondrial	7.333	15	5	6	5	1	439	48.5	7.03	0
P36551	Oxygen-dependent coproporphyrinogen-III oxidase, mitochondrial	1.665	4	1	2	1	1	454	50.1	8.25	0
P20962	Parathymosin	-	12	1	2	1	1	102	11.5	4.16	5.62
O00151	PDZ and LIM domain protein 1	2.935	10	2	5	2	1	329	36	7.02	0
P62937	Peptidyl-prolyl cis-trans isomerase A	58.593	75	11	67	11	1	165	18	7.81	82.47
P23284	Peptidyl-prolyl cis-trans isomerase B	1.905	6	1	1	1	1	216	23.7	9.41	0
Q02790	Peptidyl-prolyl cis-trans isomerase FKBP4	5.378	5	2	10	2	1	459	51.8	5.43	3.52
Q13526	Peptidyl-prolyl cis-trans isomerase NIMA-interacting 1	1.627	9	1	1	1	1	163	18.2	8.82	0
Q9Y237	Peptidyl-prolyl cis-trans isomerase NIMA-interacting 4	2.428	11	1	3	1	1	131	13.8	9.77	2.18
Q06830	Peroxiredoxin-1	32.776	55	10	50	8	1	199	22.1	8.13	44.71
P32119	Peroxiredoxin-2	14.43	30	7	22	6	1	198	21.9	5.97	6.33
Q13162	Peroxiredoxin-4	13.526	13	3	16	2	1	271	30.5	6.29	16.69
P30044	Peroxiredoxin-5, mitochondrial	1.835	5	1	2	1	1	214	22.1	8.7	0
P30041	Peroxiredoxin-6	7.99	21	4	6	4	1	224	25	6.38	2.29
A0A0D9SGE8	PHD finger protein 6	1.587	4	1	1	1	1	366	41.3	8.68	0
Q7RTV0	PHD finger-like domain-containing protein 5A	0.955	8	1	1	1	1	110	12.4	8.41	0
Q9NSD9	Phenylalanine--tRNA ligase beta subunit	3.631	5	2	4	2	1	589	66.1	6.84	0
Q00325	Phosphate carrier protein, mitochondrial	2.653	6	2	3	2	1	362	40.1	9.38	0
P30086	Phosphatidylethanolamine-binding protein 1	2.482	14	1	2	1	1	187	21	7.53	0
P00558	Phosphoglycerate kinase 1	29.394	40	10	28	10	1	417	44.6	8.1	20.95
P18669	Phosphoglycerate mutase 1	21.218	37	7	21	7	1	254	28.8	7.18	16.82
Q9Y617	Phosphoserine aminotransferase	1.642	3	1	1	1	1	370	40.4	7.66	0
Q8NC51	Plasminogen activator inhibitor 1 RNA-binding protein	-	7	2	2	2	1	408	44.9	8.65	2.61
P13797	Plastin-3	5.469	4	2	3	2	1	630	70.8	5.6	2.22
P68402	Platelet-activating factor acetylhydrolase IB subunit beta	1.201	7	1	1	1	1	229	25.6	5.92	0
P09874	Poly [ADP-ribose] polymerase 1	46.933	22	16	44	16	1	1014	113	8.88	35.46
Q15365	Poly(rC)-binding protein 1	8.635	19	4	9	1	1	356	37.5	7.09	0
Q15366	Poly(rC)-binding protein 2	12.233	26	6	14	3	1	365	38.6	6.79	0
Q9UHX1	Poly(U)-binding-splicing factor PUF60	1.064	4	1	1	1	1	559	59.8	5.29	0
P11940	Polyadenylate-binding protein 1	11.956	11	6	17	6	1	636	70.6	9.5	6.17
Q86U42	Polyadenylate-binding protein 2	1.468	4	1	1	1	1	306	32.7	5.06	0
A0A0U1RRM4	Polypyrimidine tract-binding protein 1	9.541	16	5	11	5	1	588	62.4	9.1	3.4
P20264	POU domain, class 3, transcription factor 3	0.971	13	1	1	1	1	500	50.3	7.87	0
O60925	Prefoldin subunit 1	2.952	9	1	1	1	1	122	14.2	6.81	1.77
Q9UHV9	Prefoldin subunit 2	2.548	20	2	4	2	1	154	16.6	6.58	0
P02545	Prelamin-A/C	1.01	2	1	2	1	1	664	74.1	7.02	0
Q9UMS4	Pre-mRNA-processing factor 19	1.344	4	1	2	1	1	504	55.1	6.61	0
O43143	Pre-mRNA-splicing factor ATP-dependent RNA helicase DHX15	7.24	3	2	2	2	1	795	90.9	7.46	2.35
O75934	Pre-mRNA-splicing factor SPF27	1.221	6	1	1	1	1	225	26.1	5.66	0
P46087	Probable 28S rRNA (cytosine(4447)-C(5))-methyltransferase	4.347	4	3	5	3	1	812	89.2	9.23	0
A0A1W2PQ51	Probable ATP-dependent RNA helicase DDX17	24.085	17	10	28	5	1	731	80.4	8.37	15.89
A0A0C4DG89	Probable ATP-dependent RNA helicase DDX46	1.068	1	1	1	1	1	1032	117.4	9.29	0
J3KTA4	Probable ATP-dependent RNA helicase DDX5	16.978	14	9	23	4	1	614	69	8.85	12.97
B7ZLQ5	Probable global transcription activator SNF2L1	1.148	1	1	1	1	1	1070	124.2	8.4	0
G5E9Q6	Profilin	1.065	4	1	1	1	1	188	20.8	7.52	0
P07737	Profilin-1	18.937	48	7	29	7	1	140	15	8.27	28.5
Q8WUM4	Programmed cell death 6-interacting protein	2.813	2	2	3	2	1	868	96	6.52	1.63
O14737	Programmed cell death protein 5	9.936	28	3	9	3	1	125	14.3	6.04	15.35
P35232	Prohibitin	8.66	22	4	5	4	1	272	29.8	5.76	3.9
Q99623	Prohibitin-2	6.98	15	3	9	3	1	299	33.3	9.83	4.18
P12004	Proliferating cell nuclear antigen	11.273	25	5	10	5	1	261	28.8	4.69	6.52
P46013	Proliferation marker protein Ki-67	0.905	1	1	1	1	1	3256	358.5	9.45	0
Q9UQ80	Proliferation-associated protein 2G4	3.368	5	2	6	2	1	394	43.8	6.55	0
P01303	Pro-neuropeptide Y	1.647	14	1	1	1	1	97	10.8	7.18	0
A0A087WYT3	Prostaglandin E synthase 3	1.161	10	1	1	1	1	164	19.1	4.55	0
G3V5Z7	Proteasome subunit alpha type	4.027	10	2	2	2	1	252	28.1	6.76	1.72
P25786	Proteasome subunit alpha type-1	6.272	14	3	4	3	1	263	29.5	6.61	0
P25788	Proteasome subunit alpha type-3	3.199	5	1	4	1	1	255	28.4	5.33	5.1
O14818	Proteasome subunit alpha type-7	2.991	9	2	6	2	1	248	27.9	8.46	1.64
P28070	Proteasome subunit beta type-4	1.487	6	1	1	1	1	264	29.2	5.97	0
P28072	Proteasome subunit beta type-6	3.612	5	1	4	1	1	239	25.3	4.92	7.71
O14744	Protein arginine N-methyltransferase 5	0.97	3	1	2	1	1	637	72.6	6.29	0
Q9UKY7	Protein CDV3 homolog	1.468	3	1	1	1	1	258	27.3	6.4	0
P35659	Protein DEK	1.021	3	1	2	1	1	375	42.6	8.56	0
H7BZJ3	Protein disulfide-isomerase A3	-	11	1	1	1	1	123	13.5	7.3	2.47
P30101	Protein disulfide-isomerase A3	23.168	25	12	31	9	1	505	56.7	6.35	1.61
P13667	Protein disulfide-isomerase A4	7.491	7	3	4	3	1	645	72.9	5.07	4
Q15084	Protein disulfide-isomerase A6	-	3	1	1	1	1	440	48.1	5.08	0
P07237	Protein disulfide-isomerase	3.079	6	2	5	2	1	508	57.1	4.87	0
Q14320	Protein FAM50A	1.289	5	1	1	1	1	339	40.2	6.83	0
O15355	Protein phosphatase 1G	1.31	2	1	1	1	1	546	59.2	4.36	0
Q9Y520	Protein PRRC2C	1.073	0	1	1	1	1	2896	316.7	9.13	0
Q96PU8	Protein quaking	1.089	2	1	1	1	1	341	37.6	8.56	0
Q9P258	Protein RCC2	7.438	11	4	8	4	1	522	56	8.78	0
Q13123	Protein Red	1.047	2	1	1	1	1	557	65.6	6.64	0
A0A0A6YYL6	Protein RPL17-C18orf32	2.993	5	1	3	1	1	228	26.4	10.1	2.35
Q01105	Protein SET	3.25	12	2	4	2	1	290	33.5	4.32	0
P0DME0	Protein SETSIP	1.514	4	1	1	1	1	302	34.9	4.31	0
Q9Y2Z0	Protein SGT1 homolog	0.989	3	1	1	1	1	365	41	5.16	0
Q99497	Protein/nucleic acid deglycase DJ-1	-	4	1	1	1	1	189	19.9	6.79	0
H7BY58	Protein-L-isoaspartate O-methyltransferase	1.173	3	1	2	1	1	286	30.3	6.73	1.91
H7C2N1	Prothymosin alpha	-	7	1	2	1	1	148	15.8	4.23	2.46
Q9Y383	Putative RNA-binding protein Luc7-like 2	6.042	14	4	7	4	1	392	46.5	10.01	3.29
Q5T440	Putative transferase CAF17, mitochondrial	1.695	3	1	1	1	1	356	38.1	9.83	0
Q5JXB2	Putative ubiquitin-conjugating enzyme E2 N-like	3.811	20	2	6	2	1	153	17.4	5.92	0
P08559	Pyruvate dehydrogenase E1 component subunit alpha, somatic form, mitochondrial	3.449	8	3	4	3	1	390	43.3	8.06	0
P11177	Pyruvate dehydrogenase E1 component subunit beta, mitochondrial	3.509	4	1	3	1	1	359	39.2	6.65	3.6
P14618	Pyruvate kinase PKM	-	2	1	2	1	1	531	57.9	7.84	3.55
P31150	Rab GDP dissociation inhibitor alpha	5.555	5	3	8	1	1	447	50.6	5.14	5.15
P50395	Rab GDP dissociation inhibitor beta	7.999	8	4	11	2	1	445	50.6	6.47	4.52
A0A2R8Y5S7	Radixin	1.549	2	1	2	1	1	590	69.3	6.27	0
P46060	Ran GTPase-activating protein 1	1.807	2	1	3	1	1	587	63.5	4.68	0
Q9H6Z4	Ran-binding protein 3	2.077	2	1	2	1	1	567	60.2	4.78	0
F6WQW2	Ran-specific GTPase-activating protein	7.599	12	3	7	3	1	278	31.9	8.75	0
Q13283	Ras GTPase-activating protein-binding protein 1	3.758	9	3	3	3	1	466	52.1	5.52	0
P46940	Ras GTPase-activating-like protein IQGAP1	1.728	0	1	2	1	1	1657	189.1	6.48	0
Q86VI3	Ras GTPase-activating-like protein IQGAP3	1.139	1	1	1	1	1	1631	184.6	7.65	0
P63000	Ras-related C3 botulinum toxin substrate 1	1.125	8	1	1	1	1	192	21.4	8.5	0
P61026	Ras-related protein Rab-10	3.975	11	2	8	1	1	200	22.5	8.38	3.32
P62820	Ras-related protein Rab-1A	1.993	8	2	3	1	1	205	22.7	6.21	0
Q9H0U4	Ras-related protein Rab-1B	5.793	16	3	6	2	1	201	22.2	5.73	3.32
P61224	Ras-related protein Rap-1b	2.125	6	1	3	1	1	184	20.8	5.78	0
P63244	Receptor of activated protein C kinase 1	11.735	18	7	12	7	1	317	35.1	7.69	1.81
P18754	Regulator of chromosome condensation	1.019	2	1	1	1	1	421	44.9	7.52	0
Q92900	Regulator of nonsense transcripts 1	0.876	1	1	1	1	1	1129	124.3	6.61	0
O94788	Retinal dehydrogenase 2	1.34	2	1	2	1	1	518	56.7	6.05	0
J3QQX2	Rho GDP-dissociation inhibitor 1	2.499	6	1	2	1	1	235	25.8	7.44	0
Q5JR05	Rho-related GTP-binding protein RhoC	1.433	8	1	3	1	1	199	22	7.91	0
P13489	Ribonuclease inhibitor	4.224	5	2	6	2	1	461	49.9	4.82	1.61
E9PAU2	Ribonucleoprotein PTB-binding 1	1.296	5	1	1	1	1	756	79.5	8.92	0
A0A2R8Y7H4	Ribose-phosphate pyrophosphokinase	4.269	7	3	3	3	1	321	35.3	7.61	0
O76021	Ribosomal L1 domain-containing protein 1	1.924	2	1	3	1	1	490	54.9	10.13	0
Q9Y224	RNA transcription, translation and transport factor protein	1.031	12	1	1	1	1	244	28.1	6.65	0
P38159	RNA-binding motif protein, X chromosome	9.457	14	3	9	3	1	391	42.3	10.05	12.76
Q96PK6	RNA-binding protein 14	4.871	6	3	4	3	1	669	69.4	9.67	0
P49756	RNA-binding protein 25	2.133	3	2	2	2	1	843	100.1	6.32	0
P98179	RNA-binding protein 3	1.017	11	1	1	1	1	157	17.2	8.91	0
Q14498	RNA-binding protein 39	1.922	3	1	2	1	1	530	59.3	10.1	0
Q9Y5S9	RNA-binding protein 8A	1.497	11	1	1	1	1	174	19.9	5.72	0
P22087	rRNA 2'-O-methyltransferase fibrillarin	12.644	19	4	8	4	1	321	33.8	10.18	5.31
Q9Y265	RuvB-like 1	10.334	13	5	14	5	1	456	50.2	6.42	3.82
Q9Y230	RuvB-like 2	8.936	10	4	7	4	1	463	51.1	5.64	2.19
P31153	S-adenosylmethionine synthase isoform type-2	0.994	4	1	1	1	1	395	43.6	6.48	0
P16615	Sarcoplasmic/endoplasmic reticulum calcium ATPase 2	1.078	2	1	1	1	1	1042	114.7	5.34	0
Q15424	Scaffold attachment factor B1	7.523	5	4	6	4	1	915	102.6	5.47	2
Q15019	Septin-2	1.01	4	1	1	1	1	361	41.5	6.6	0
Q9UHD8	Septin-9	2.343	3	1	1	1	1	586	65.4	8.97	0
P34897	Serine hydroxymethyltransferase, mitochondrial	6.851	11	4	8	4	1	504	56	8.53	0
Q9UQ35	Serine/arginine repetitive matrix protein 2	8.14	3	6	14	6	1	2752	299.4	12.06	1.61
O75494	Serine/arginine-rich splicing factor 10	3.801	5	1	3	1	1	262	31.3	11.27	0
Q01130	Serine/arginine-rich splicing factor 2	4.537	5	2	8	2	1	221	25.5	11.85	7.19
P84103	Serine/arginine-rich splicing factor 3	7.128	23	3	8	3	1	164	19.3	11.65	2.11
Q13247	Serine/arginine-rich splicing factor 6	9.859	11	4	13	4	1	344	39.6	11.43	8.97
Q16629	Serine/arginine-rich splicing factor 7	1.725	7	1	1	1	1	238	27.4	11.82	0
J3KTL2	Serine/arginine-rich-splicing factor 1	3.331	8	2	4	2	1	253	28.3	10.08	0
P30153	Serine/threonine-protein phosphatase 2A 65 kDa regulatory subunit A alpha isoform	3.987	4	2	6	2	1	589	65.3	5.11	7.51
P53041	Serine/threonine-protein phosphatase 5	1.137	3	1	1	1	1	499	56.8	6.28	0
Q9Y3F4	Serine-threonine kinase receptor-associated protein	-	2	1	1	1	1	350	38.4	5.12	0
Q5T5C7	Serine--tRNA ligase, cytoplasmic	1.539	2	1	3	1	1	536	61.3	7.06	0
P50454	Serpin H1	1.504	3	1	2	1	1	418	46.4	8.69	0
P02768	Serum albumin	1.165	1	1	1	1	1	609	69.3	6.28	0
P10768	S-formylglutathione hydrolase	1.427	4	1	1	1	1	282	31.4	7.02	0
Q9NR45	Sialic acid synthase	2.618	10	2	2	2	1	359	40.3	6.74	0
Q9H9B4	Sideroflexin-1	5.095	7	2	4	2	1	322	35.6	9.07	1.9
E9PI68	Signal peptidase complex subunit 2	1.276	4	1	2	1	1	257	28.5	8.79	0
P49458	Signal recognition particle 9 kDa protein	1.92	12	1	1	1	1	86	10.1	7.97	0
O00193	Small acidic protein	1.861	13	1	1	1	1	183	20.3	4.72	0
P62304	Small nuclear ribonucleoprotein E	2.115	12	1	4	1	1	92	10.8	9.44	1.76
P62306	Small nuclear ribonucleoprotein F	1.426	9	1	2	1	1	86	9.7	4.67	0
P62316	Small nuclear ribonucleoprotein Sm D2	3.754	33	2	3	2	1	118	13.5	9.91	0
P62318	Small nuclear ribonucleoprotein Sm D3	1.577	10	1	1	1	1	126	13.9	10.32	0
P14678	Small nuclear ribonucleoprotein- B and B'	2.956	7	2	4	2	1	240	24.6	11.19	0
A8MU27	Small ubiquitin-related modifier 3	2.819	8	1	4	1	1	147	16.9	9.67	3.49
P05023	Sodium/potassium-transporting ATPase subunit alpha-1	7.994	9	6	10	6	1	1023	112.8	5.49	0
P54709	Sodium/potassium-transporting ATPase subunit beta-3	1.137	4	1	2	1	1	279	31.5	8.35	0
O60749	Sorting nexin-2	1.988	3	1	2	1	1	519	58.4	5.12	0
Q13838	Spliceosome RNA helicase DDX39B	8.86	11	5	12	5	1	428	49	5.67	9.34
Q15459	Splicing factor 3A subunit 1	1.4	2	1	1	1	1	793	88.8	5.22	0
O75533	Splicing factor 3B subunit 1	2.406	2	2	2	2	1	1304	145.7	7.09	0
Q13435	Splicing factor 3B subunit 2	2.175	2	1	4	1	1	895	100.2	5.67	0
Q15393	Splicing factor 3B subunit 3	1.536	1	1	2	1	1	1217	135.5	5.26	0
Q01081	Splicing factor U2AF 35 kDa subunit	3.25	6	1	4	1	1	240	27.9	8.81	0
P26368	Splicing factor U2AF 65 kDa subunit	0.967	4	1	1	1	1	475	53.5	9.09	0
P23246	Splicing factor, proline- and glutamine-rich	21.639	13	9	24	9	1	707	76.1	9.44	16.92
G3V2S9	SRA stem-loop-interacting RNA-binding protein, mitochondrial	1.395	8	1	1	1	1	124	13.9	11.09	0
Q7KZF4	Staphylococcal nuclease domain-containing protein 1	5.558	4	3	5	3	1	910	101.9	7.17	3.36
P16949	Stathmin	8.34	24	3	19	3	1	149	17.3	5.97	11.91
Q9UJZ1	Stomatin-like protein 2, mitochondrial	1.465	6	1	1	1	1	356	38.5	7.39	0
P38646	Stress-70 protein, mitochondrial	37.157	26	14	38	14	1	679	73.6	6.16	31.78
P31948	Stress-induced-phosphoprotein 1	11.606	9	4	11	4	1	543	62.6	6.8	11.16
Q14683	Structural maintenance of chromosomes protein 1A	1.358	1	1	1	1	1	1233	143.1	7.64	0
O95347	Structural maintenance of chromosomes protein 2	2.808	3	2	2	2	1	1197	135.6	8.43	0
P31040	Succinate dehydrogenase [ubiquinone] flavoprotein subunit, mitochondrial	1.271	1	1	2	1	1	664	72.6	7.39	0
Q9UBT2	SUMO-activating enzyme subunit 2	2.592	3	2	2	2	1	640	71.2	5.29	0
B0QYN7	SUMO-conjugating enzyme UBC9	1.619	5	1	3	1	1	184	20.4	8.46	0
P00441	Superoxide dismutase [Cu-Zn]	11.807	34	2	9	2	1	154	15.9	6.13	8.82
Q96A49	Synapse-associated protein 1	1.288	4	1	1	1	1	352	39.9	4.53	0
Q99536	Synaptic vesicle membrane protein VAT-1 homolog	1.373	5	1	1	1	1	393	41.9	6.29	0
H0YN01	Talin-2	0.97	4	1	2	1	1	330	35.3	5.06	0
Q9BX59	Tapasin-related protein	0.971	3	1	1	1	1	468	50.2	5.26	0
Q0IIM8	TBC1 domain family member 8B	0.993	1	1	1	1	1	1120	128.6	5.95	0
Q16650	T-box brain protein 1	1.211	2	1	1	1	1	682	74	7.33	0
A0A075B6Z2	T-cell receptor alpha joining 56	-	38	1	1	1	1	21	2.2	10.29	1.73
P17987	T-complex protein 1 subunit alpha	9.987	10	5	13	5	1	556	60.3	6.11	7.33
P78371	T-complex protein 1 subunit beta	-	4	1	1	1	1	535	57.5	6.46	0
P50991	T-complex protein 1 subunit delta	15.933	18	7	16	6	1	539	57.9	7.83	6.81
P48643	T-complex protein 1 subunit epsilon	-	2	1	1	1	1	541	59.6	5.66	0
Q99832	T-complex protein 1 subunit eta	9.808	10	5	11	5	1	543	59.3	7.65	9.79
P49368	T-complex protein 1 subunit gamma	29.829	35	13	26	13	1	545	60.5	6.49	18.44
P50990	T-complex protein 1 subunit theta	18.717	17	8	19	8	1	548	59.6	5.6	10.76
P40227	T-complex protein 1 subunit zeta	5.933	12	4	7	4	1	531	58	6.68	0
Q9BRA2	Thioredoxin domain-containing protein 17	2.844	15	2	2	2	1	123	13.9	5.52	0
Q8NBS9	Thioredoxin domain-containing protein 5	5.239	6	2	6	2	1	432	47.6	5.97	9.53
P10599	Thioredoxin	-	9	1	1	1	1	105	11.7	4.92	1.78
Q16881	Thioredoxin reductase 1, cytoplasmic	0.948	6	1	1	1	1	649	70.9	7.39	0
Q16762	Thiosulfate sulfurtransferase	1.175	6	1	1	1	1	297	33.4	7.25	0
E9PB61	THO complex subunit 4	5.885	22	3	6	3	1	264	27.5	11.05	2.29
P26639	Threonine--tRNA ligase, cytoplasmic	3.961	5	3	4	3	1	723	83.4	6.67	0
P23919	Thymidylate kinase	1.045	6	1	1	1	1	212	23.8	8.27	0
Q9Y2W1	Thyroid hormone receptor-associated protein 3	3.315	3	2	4	2	1	955	108.6	10.15	0
P37837	Transaldolase	-	2	1	2	1	1	337	37.5	6.81	1.64
A0A1W2PPZ5	Transcription elongation factor A protein 1	1.35	3	1	1	1	1	301	33.9	8.38	0
O14776	Transcription elongation regulator 1	1.476	1	1	1	1	1	1098	123.8	8.65	0
Q00059	Transcription factor A, mitochondrial	2.429	4	1	2	1	1	246	29.1	9.72	0
Q13263	Transcription intermediary factor 1-beta	10.741	11	7	11	7	1	835	88.5	5.77	0
H0YL70	Transducin-like enhancer protein 3	0.936	2	1	1	1	1	782	84.4	7.27	0
Q13595	Transformer-2 protein homolog alpha	1.538	5	1	2	1	1	282	32.7	11.27	0
P37802	Transgelin-2	9.202	23	4	5	4	1	199	22.4	8.25	3.62
P55072	Transitional endoplasmic reticulum ATPase	6.441	4	3	10	3	1	806	89.3	5.26	5.65
P29401	Transketolase	14.85	17	8	15	8	1	623	67.8	7.66	3.95
P30536	Translocator protein	-	14	1	1	1	1	169	18.8	9.36	0
P49755	Transmembrane emp24 domain-containing protein 10	1.73	4	1	2	1	1	219	25	7.44	0
Q9BVC6	Transmembrane protein 109	2.164	5	1	3	1	1	243	26.2	10.48	0
Q92973	Transportin-1	0.99	1	1	1	1	1	898	102.3	4.98	0
E7ETY2	Treacle protein	6.18	3	3	6	3	1	1488	152.2	8.85	0
P22102	Trifunctional purine biosynthetic protein adenosine-3	14.823	11	8	15	8	1	1010	107.7	6.7	0
P60174	Triosephosphate isomerase	48.339	62	15	39	15	1	286	30.8	5.92	44.83
Q9Y3I0	tRNA-splicing ligase RtcB homolog	1.477	2	1	1	1	1	505	55.2	7.23	0
F5H5D3	Tubulin alpha chain	-	5	2	2	2	1	519	57.7	5.07	1.77
P68363	Tubulin alpha-1B chain	66.914	52	19	71	4	1	451	50.1	5.06	95.29
P07437	Tubulin beta chain	102.22	60	20	116	4	1	444	49.6	4.89	200.36
P04350	Tubulin beta-4A chain	64.914	48	16	77	2	1	444	49.6	4.88	132.52
P68371	Tubulin beta-4B chain	97.343	60	21	102	3	1	445	49.8	4.89	176.56
E5RJD8	Tubulin-specific chaperone A	-	8	1	1	1	1	119	14.3	5.12	0
E5RHG6	Tubulin-specific chaperone A	8.296	38	4	7	4	1	131	15.1	5.16	6.43
A0A087WYR3	Tumor protein D54	1.932	6	1	1	1	1	222	23.8	6.55	0
P07948	Tyrosine-protein kinase Lyn	2.726	3	2	3	2	1	512	58.5	7.11	1.7
P54577	Tyrosine--tRNA ligase, cytoplasmic	0.941	3	1	1	1	1	528	59.1	7.05	0
P08621	U1 small nuclear ribonucleoprotein 70 kDa	2.702	2	1	3	1	1	437	51.5	9.94	0
O43395	U4/U6 small nuclear ribonucleoprotein Prp3	0.979	1	1	1	1	1	683	77.5	9.5	0
O75643	U5 small nuclear ribonucleoprotein 200 kDa helicase	3.651	1	2	3	2	1	2136	244.4	6.06	0
P62310	U6 snRNA-associated Sm-like protein LSm3	3.38	14	2	5	2	1	102	11.8	4.7	0
Q9UK45	U6 snRNA-associated Sm-like protein LSm7	1.866	16	2	2	2	1	103	11.6	5.27	0
Q9NRR5	Ubiquilin-4	2.14	3	1	1	1	1	601	63.8	5.22	0
P54578	Ubiquitin carboxyl-terminal hydrolase 14	1.027	3	1	1	1	1	494	56	5.3	0
P45974	Ubiquitin carboxyl-terminal hydrolase 5	1.036	2	1	1	1	1	858	95.7	5.03	0
P09936	Ubiquitin carboxyl-terminal hydrolase isozyme L1	10.741	38	6	10	6	1	223	24.8	5.48	8.24
F5GYJ8	Ubiquitin thioesterase OTUB1	2.114	7	1	1	1	1	286	32.3	4.96	0
P62979	Ubiquitin-40S ribosomal protein S27a	-	14	2	2	2	1	156	18	9.64	3.71
Q14157	Ubiquitin-associated protein 2-like	1.043	1	1	1	1	1	1087	114.5	7.11	0
P22314	Ubiquitin-like modifier-activating enzyme 1	12.521	8	6	14	6	1	1058	117.8	5.76	4.41
H0YHG0	Uncharacterized protein	1.826	2	1	1	1	1	523	59.1	8.59	0
H7C0C1	Uncharacterized protein	5.449	11	2	5	2	1	242	26.8	9.45	3.02
Q6ZSJ8	Uncharacterized protein C1orf122	1.275	16	1	1	1	1	110	11.5	6.73	0
H3BNC9	Uncharacterized protein	4.662	6	2	2	2	1	584	64.5	8.78	0
A0A2R8Y422	Uncharacterized protein	0.85	12	1	1	1	1	156	18	9.47	0
A0A0B4J269	Uncharacterized protein	-	2	1	1	1	1	797	88.3	5.86	0
Q96QK1	Vacuolar protein sorting-associated protein 35	1.012	1	1	1	1	1	796	91.6	5.49	0
P26640	Valine--tRNA ligase	0.886	1	1	1	1	1	1264	140.4	7.59	0
P08670	Vimentin	47.297	45	18	53	18	1	466	53.6	5.12	48.85
P18206	Vinculin	1.016	1	1	1	1	1	1134	123.7	5.66	0
P21796	Voltage-dependent anion-selective channel protein 1	3.144	12	2	2	2	1	283	30.8	8.54	0
P45880	Voltage-dependent anion-selective channel protein 2	4.189	14	3	4	3	1	294	31.5	7.56	1.88
P38606	V-type proton ATPase catalytic subunit A	2.147	2	1	1	1	1	617	68.3	5.52	0
Q2TAY7	WD40 repeat-containing protein SMU1	1.249	2	1	1	1	1	513	57.5	7.18	0
P13010	X-ray repair cross-complementing protein 5	2.477	4	2	3	2	1	732	82.7	5.81	0
P12956	X-ray repair cross-complementing protein 6	17.619	15	6	13	6	1	609	69.8	6.64	4.65
O95789	Zinc finger MYM-type protein 6	1.022	1	1	1	1	1	1325	148	8.22	0
